# Supplementary material for: Altered Expression of OsAAP3 Influences Rice Lesion Mimic and Leaf Senescence by Regulating Arginine Transport and Nitric Oxide Pathway
Source: PubMed Central journal article supplement (PMC7927093; doi:10.3390/ijms22042181), 2021-02-22
Supplement: ijms-22-02181-s001.pdf [file ijms-22-02181-s001.pdf]

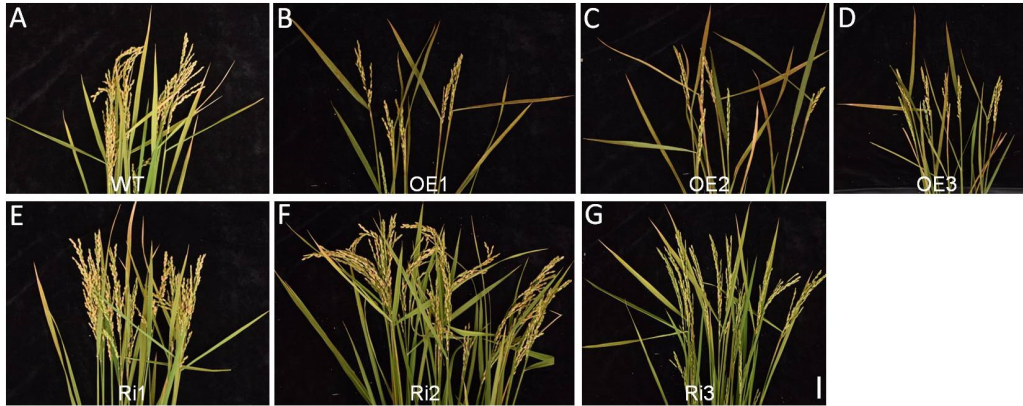

**Figure S1.** Whole plant phenotype of the rice leaves with altered expression of *OsAAP3* grown in paddy field.

WT (A) indicates wild-type ZH11, OE1-OE3 (B-D) indicate overexpressing lines and Ri1-Ri3 (E-G) indicate RNA interference lines. The flag leaves was taken at 120 days after sowing. Scale bar =3.0 cm in A-G.

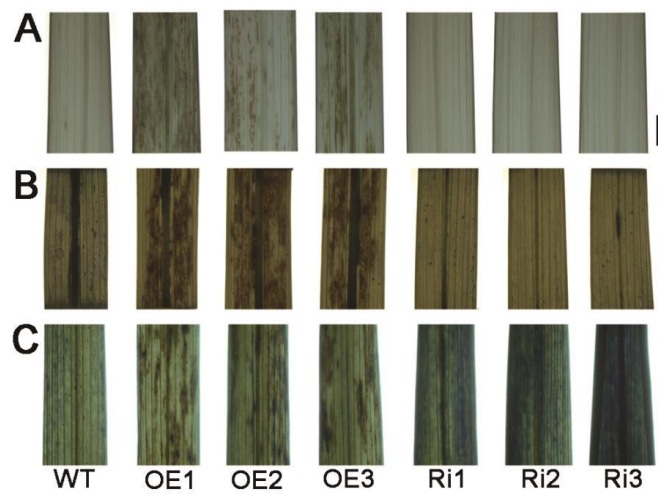

**Figure S2.** Flag leaf phenotype of the overexpressing (OE) lines, RNA interference (Ri) lines, and wild-type (WT) under diaminobenzidine (DAB, A), nitroblue tetrazolium (NBT, B), and trypan blue (TB, C) staining.

The flag leaves was taken at 95 days after sowing. Scale bar =0.5 cm in A-C.

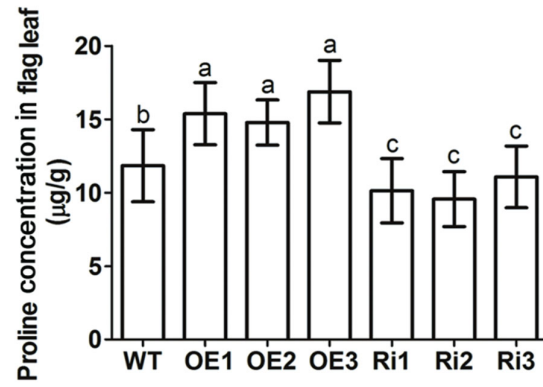

**Figure S3.** Proline (Pro) concentration of the *OsAAP3* OE lines, Ri lines, and WT at the heading stage. The flag leaves were taken at 110 days after sowing. The letters above the error bars are ranked by the Duncan test at  $p < 0.05$ . Values are means  $\pm$  standard deviation ( $n=5$ ).

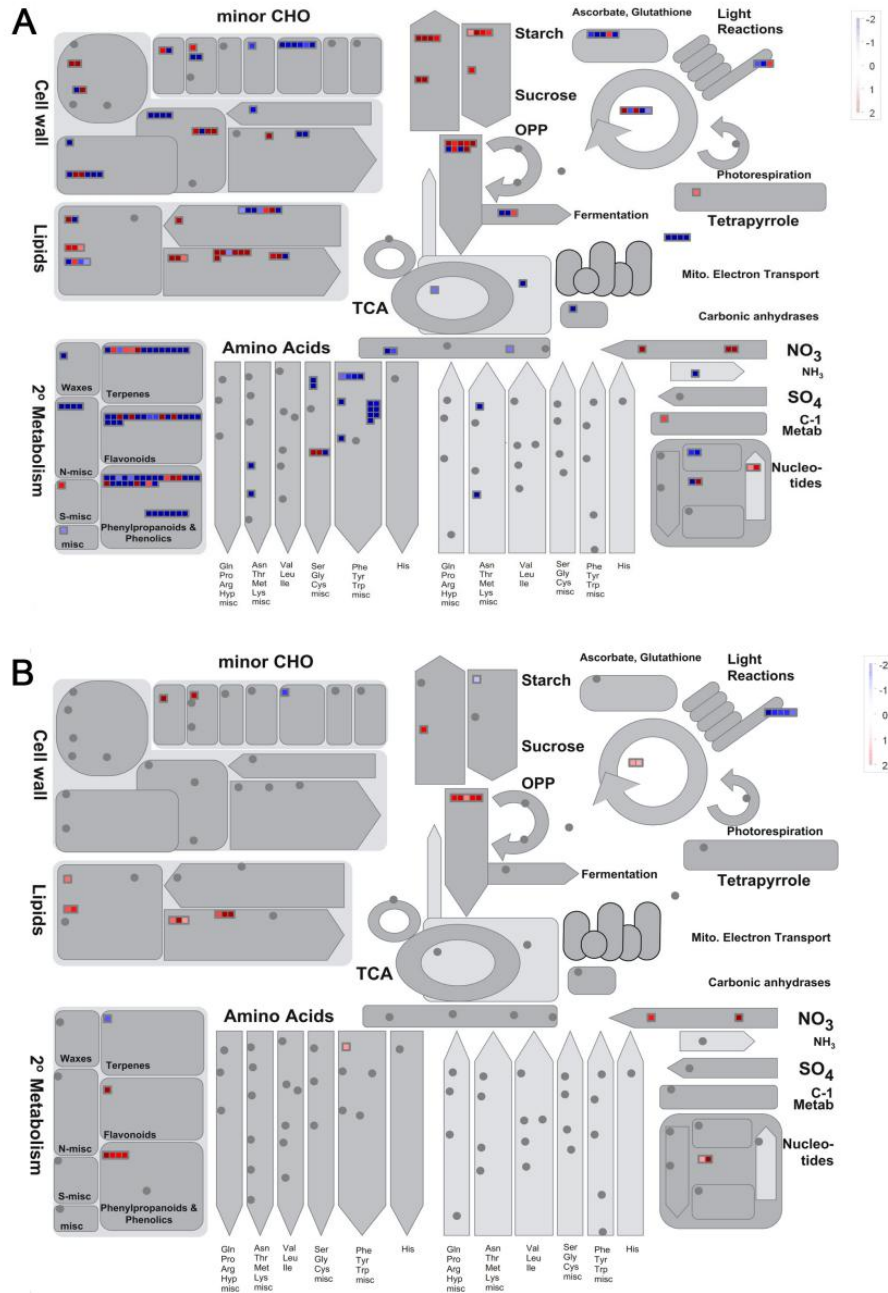

**Figure S4.** Metabolic pathways covered by the transcriptional changes affecting the *OsAAP3* OE and Ri Lines.

Overview of expression changes in the metabolic pathways in leaves of the overexpressing (OE) (A) and RNA interference (Ri) lines (B) using MapMan software. Only the genes showing a significant ( $P < 0.05$ ) change in expression between OE and WT and between Ri and WT are represented and were attributed to the respective bins by MapMan. Genes whose expression increased or decreased are shown by an increasingly intense blue and red color, respectively. The flag leaves were taken at 110 days after sowing.

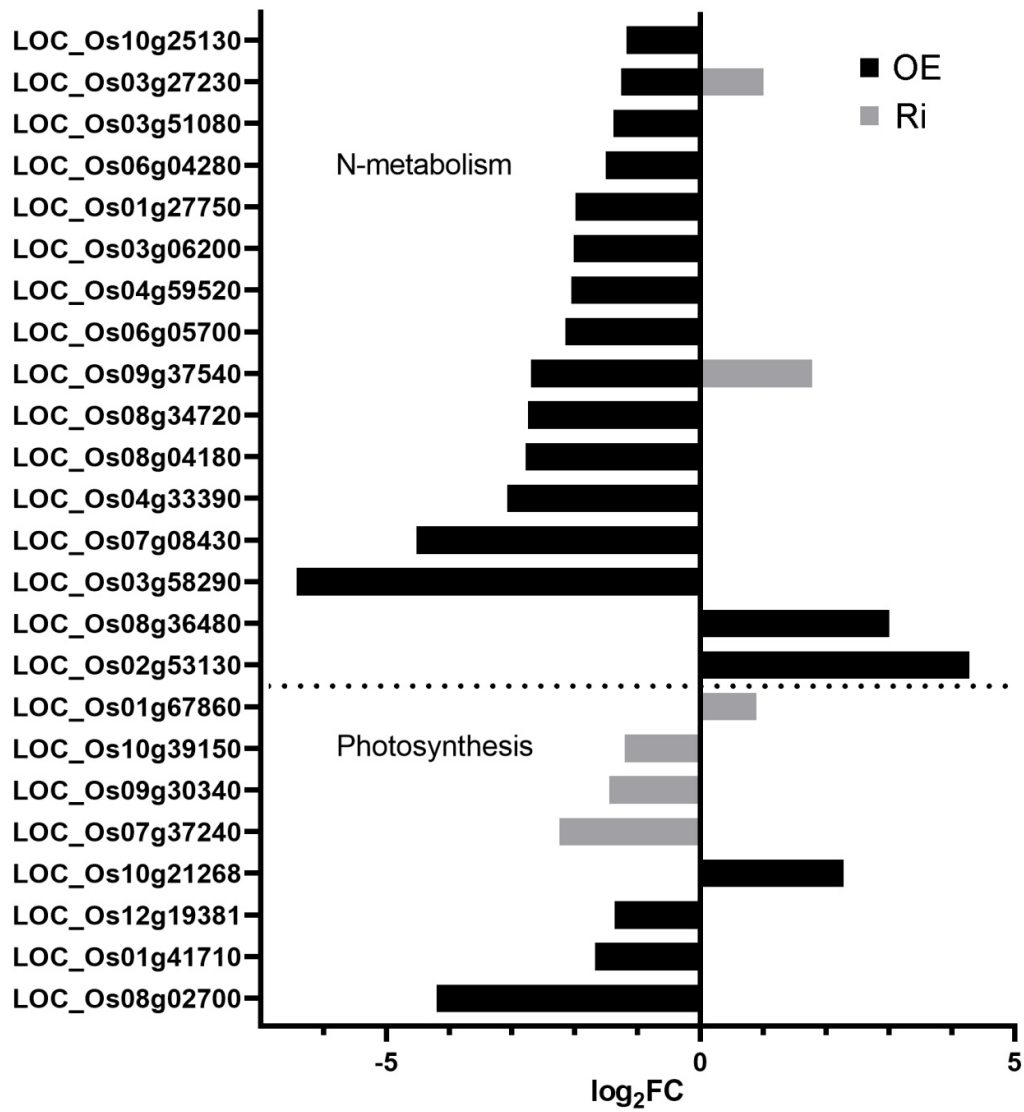

**Figure S5.** Differentially enriched genes in the nitrogen metabolism and photosynthesis pathways. The abscissa is log<sub>2</sub> Fold Change, and the ordinate is Locus Name of gene.

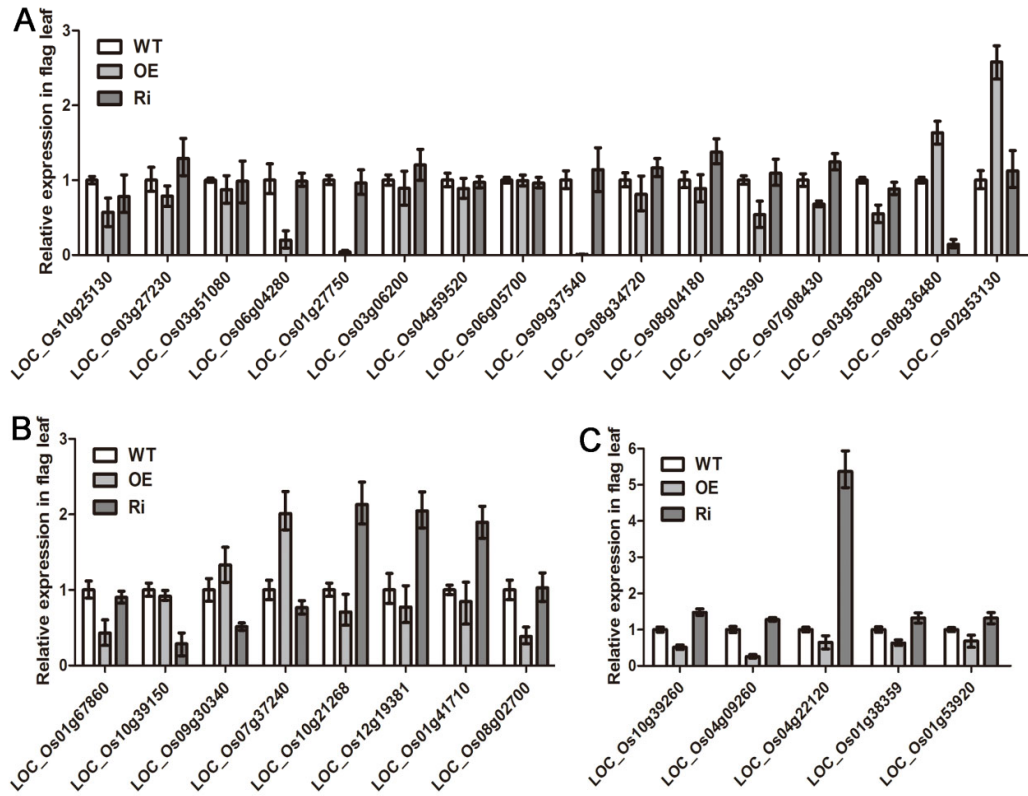

**Figure S6.** Quantitative reverse transcription PCR analysis of genes involved in nitrogen metabolism and photosynthesis pathways.

(A) Genes in nitrogen metabolism pathway from Figure S5. (B) Genes in photosynthesis metabolism pathway from Figure S5. (C) Differentially expressed genes among the OE line, Ri line, and WT from Figure 5B. The transcript levels of the first genes were defined as “1”. Data are means  $\pm$  standard deviation ( $n=3$ ). WT indicates the wild-type, OE indicates the overexpression line, and Ri indicates the RNA interference line.

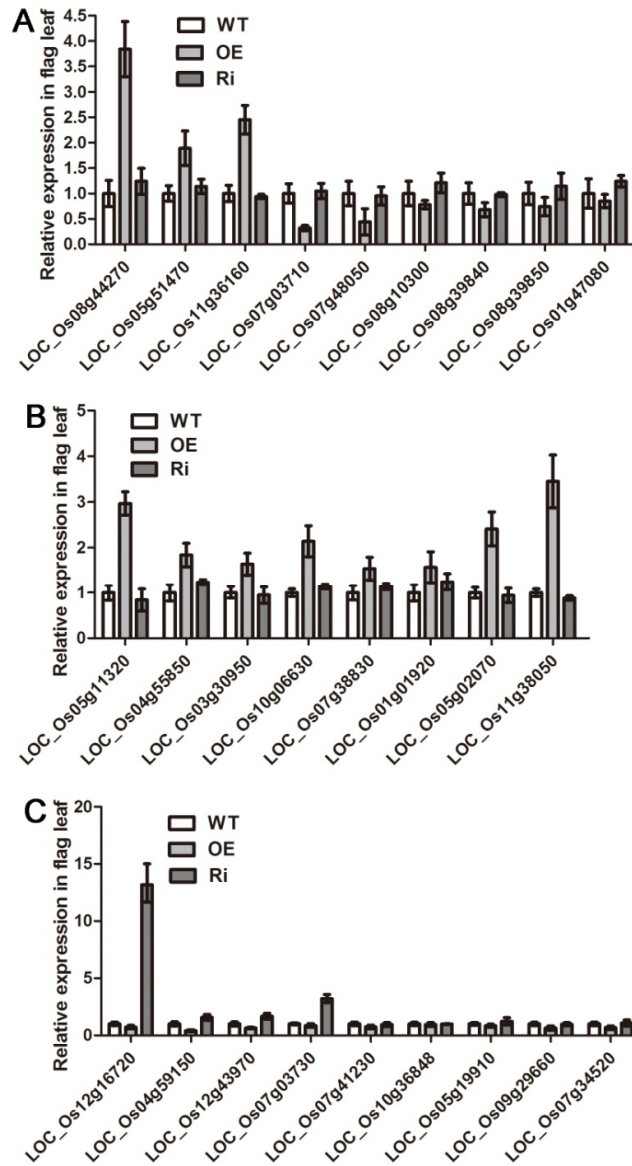

**Figure S7.** RT-PCR analysis of genes involved in lesion mimic and leaf senescence pathways. (A) Genes in lesion mimic pathway from Figure 4. (B) Increased expression genes of *OsAAP3* OE lines in leaf senescence pathway from Figure 4. (C) Decreased expression genes of *OsAAP3* OE lines in leaf senescence pathway from Figure 4. The transcript levels of the first genes were defined as “1”. Data are means  $\pm$  standard deviation (n=3). WT indicates the wild-type, OE indicates the overexpression line, and Ri indicates the RNA interference line.

**Table S1.** The locus name and corresponding notes of differentially expressed genes among the OE line, Ri line, and WT in all related pathways.

| Locus Name     | Gene Product Name                        | Classification |
|----------------|------------------------------------------|----------------|
| LOC_Os08g44270 | vignain precursor                        | Lesion mimic   |
| LOC_Os05g51470 | 2-aminoethanethiol dioxygenase           |                |
| LOC_Os11g36160 | receptor-like protein kinase 2 precursor |                |
| LOC_Os07g03710 | SCP-like extracellular protein           |                |

|                |                                                                   |                     |
|----------------|-------------------------------------------------------------------|---------------------|
| LOC_Os07g48050 | peroxidase precursor                                              |                     |
| LOC_Os08g10300 | SHR5-receptor-like kinase                                         |                     |
| LOC_Os08g39840 | lipoxygenase, chloroplast precursor                               |                     |
| LOC_Os08g39850 | lipoxygenase, chloroplast precursor                               |                     |
| LOC_Os01g47080 | pyruvate kinase                                                   |                     |
| LOC_Os05g11320 | metallothionein-like protein 3B                                   |                     |
| LOC_Os04g55850 | nuclease PA3                                                      |                     |
| LOC_Os03g30950 | acyl-desaturase, chloroplast precursor                            |                     |
| LOC_Os10g06630 | peptidyl-prolyl cis-trans isomerase                               |                     |
| LOC_Os07g38830 | hydrolase, alpha/beta fold family domain containing protein       |                     |
| LOC_Os01g01920 | HD domain containing protein 2                                    |                     |
| LOC_Os05g02070 | expressed protein                                                 |                     |
| LOC_Os11g38050 | phosphoesterase family protein                                    |                     |
| LOC_Os12g16720 | cytochrome P450 71A1                                              | Leaf senescence     |
| LOC_Os04g59150 | peroxidase precursor                                              |                     |
| LOC_Os12g43970 | hydrolase, alpha/beta fold family domain containing protein       |                     |
| LOC_Os07g03730 | SCP-like extracellular protein                                    |                     |
| LOC_Os07g41230 | esterase                                                          |                     |
| LOC_Os10g36848 | cytochrome P450                                                   |                     |
| LOC_Os05g19910 | transferase family protein                                        |                     |
| LOC_Os09g29660 | white-brown complex homolog protein 11                            |                     |
| LOC_Os07g34520 | isocitrate lyase                                                  |                     |
| LOC_Os10g25130 | aminotransferase                                                  |                     |
| LOC_Os03g27230 | phospho-2-dehydro-3-deoxyheptonate aldolase                       |                     |
| LOC_Os03g51080 | glutamate decarboxylase                                           |                     |
| LOC_Os06g04280 | 3-phosphoshikimate 1-carboxyvinyltransferase                      |                     |
| LOC_Os01g27750 | bifunctional 3-dehydroquinate dehydratase/shikimate dehydrogenase |                     |
| LOC_Os03g06200 | aminotransferase                                                  |                     |
| LOC_Os04g59520 | anthranilate phosphoribosyltransferase                            |                     |
| LOC_Os06g05700 | cysteine synthase                                                 | Nitrogen metabolism |
| LOC_Os09g37540 | uncharacterized protein PA4923                                    |                     |
| LOC_Os08g34720 | D-3-phosphoglycerate dehydrogenase                                |                     |
| LOC_Os08g04180 | tryptophan synthase beta chain 1                                  |                     |
| LOC_Os04g33390 | prephenate dehydratase domain containing protein                  |                     |
| LOC_Os07g08430 | indole-3-glycerol phosphate lyase                                 |                     |
| LOC_Os03g58290 | indole-3-glycerol phosphate lyase                                 |                     |
| LOC_Os08g36480 | nitrate reductase                                                 |                     |
| LOC_Os02g53130 | nitrate reductase                                                 |                     |
| LOC_Os01g67860 | fructose-bisphosphate aldolase isozyme                            | Photosynthesis      |

|                |                                                                     |                                                                                 |
|----------------|---------------------------------------------------------------------|---------------------------------------------------------------------------------|
| LOC_Os10g39150 | unspecified                                                         |                                                                                 |
| LOC_Os09g30340 | photosystem I reaction center subunit, chloroplast precursor        |                                                                                 |
| LOC_Os07g37240 | chlorophyll A-B binding protein                                     |                                                                                 |
| LOC_Os10g21268 | ribulose biphosphate carboxylase large chain precursor              |                                                                                 |
| LOC_Os12g19381 | ribulose biphosphate carboxylase small chain, chloroplast precursor |                                                                                 |
| LOC_Os01g41710 | chlorophyll A-B binding protein                                     |                                                                                 |
| LOC_Os08g02700 | fructose-bisphosphate aldolase isozyme                              |                                                                                 |
| LOC_Os10g39260 | aspartic proteinase nepenthesin                                     | Differentially expressed genes among the OE line, Ri line, and WT in Figure 5B. |
| LOC_Os04g09260 | transferase family protein                                          |                                                                                 |
| LOC_Os07g03730 | SCP-like extracellular protein                                      |                                                                                 |
| LOC_Os04g22120 | protein kinase                                                      |                                                                                 |
| LOC_Os09g37540 | uncharacterized protein PA4923                                      |                                                                                 |
| LOC_Os01g38359 | peptidyl-prolyl cis-trans isomerase, FKBP-type                      |                                                                                 |
| LOC_Os12g16720 | cytochrome P450 71A1                                                |                                                                                 |
| LOC_Os01g53920 | receptor-like protein kinase 5 precursor                            |                                                                                 |
| LOC_Os05g35290 | phenylalanine ammonia-lyase                                         |                                                                                 |
| LOC_Os05g15770 | glycosyl hydrolase                                                  |                                                                                 |
| LOC_Os05g05680 | 1-aminocyclopropane-1-carboxylate oxidase                           |                                                                                 |
| LOC_Os03g27230 | phospho-2-dehydro-3-deoxyheptonate aldolase, chloroplast precursor  |                                                                                 |
| LOC_Os07g42960 | phospho-2-dehydro-3-deoxyheptonate aldolase, chloroplast precursor  |                                                                                 |

**Table S2. List of the primers in this study.**

| Gene           | Forward sequence (5' - 3')   | Reverse sequence (5' - 3') |
|----------------|------------------------------|----------------------------|
| Actin          | CGGTGTCATGGTCGGAAT           | GCTCGTTGTAGAAGGTGT         |
| LOC_Os07g34520 | CGGACAGGTTCCGGCTCACCAA       | CGTAGACGGTGTGCGAGGTGCTTCG  |
| LOC_Os09g29660 | AACCCACCGTGCCGAGGTGGAA       | GCTGATCTCCAGCGACGGCT       |
| LOC_Os05g19910 | ACGTGTTCCGCCGCCACAAGA        | GTTCACGTCGTCGAGGCTGCA      |
| LOC_Os10g36848 | TCTGAGCCTGGCGATCGTCGT        | AGGTGCATCAGGCCGCCGACT      |
| LOC_Os07g41230 | ATGGGGTTCGCTGATGTCCTGCATC    | AACGAGCTCCTTGCCCCAGCA      |
| LOC_Os07g03730 | CCAGCTTGCTAGTAGCTGCAGTG      | TACTTCCC GCCGAGTCCGAGT     |
| LOC_Os12g43970 | CATCCATGGCTTCCGGAGCT         | CAGAGATGCCACGCCACCTGAGCT   |
| LOC_Os04g59150 | GTCCAAGCTGGGTATGGTTGTGCT     | ACGTGCCACCTCACGATGCCCT     |
| LOC_Os12g16720 | TGGAGCTACCATGGCGTCGA         | CATGAGGTGGAGGTGCCCGATCA    |
| LOC_Os11g38050 | GAGAACCGCTCCTTCGACCACAT<br>G | ACCTGCTCGTAGATGGCTGGA      |
| LOC_Os05g02070 | TGCAGATGCAAGATGTTCCCTGA      | CGACGATAGATTCAGTTGCAGGA    |
| LOC_Os01g01920 | TCTCGCGGATTCTCGGAGGAGG<br>A  | CAGCCGTAGTAGTGGGGTTGCTT    |



|                |                              |                           |
|----------------|------------------------------|---------------------------|
| LOC_Os07g38830 | ACGTCCTCCAGTGCCACCA          | ATGGAGGAGGCCTCGACACGCA    |
| LOC_Os10g06630 | AGGGTGTTCCTTGACATCGCCA       | GTGCACAGCCGCCGGAAGTT      |
| LOC_Os03g30950 | AGCAACAGCCTCGTCAGCCT         | TCCACCCACGCGTTCAGCGA      |
| LOC_Os04g55850 | AGATCGCCGAGGGTTTCCTG         | TGGCAATCCCGGGCGTAGTT      |
| LOC_Os05g11320 | CTGCGCTGACAAGAGCCAGTGCG<br>T | AGCAGCCGGTGGTGC ACTTG     |
| LOC_Os01g47080 | CGCAAGACAAAGATCGTGTGCA       | TGGTTGAGGCAAATCTCCACTCC   |
| LOC_Os08g39850 | ATGCTGCGTCCCCAGCTCAA         | GCACCTCACAACA ACTCGCTGC   |
| LOC_Os08g39840 | CCATCTAGCCACACGACGACGA       | CGCACACAACAACAACCCGACT    |
| LOC_Os08g10300 | ATCGCGTGCTCATGGGTTGCAGT      | GCAGTCGCACTTGATGCCGGGGTT  |
| LOC_Os07g48050 | AGCTGTCGGCGACGTTCTACGA       | TGCGCCTGATGCTGTGCGATGACG  |
| LOC_Os07g03710 | TGGCGAGTTCGTCGAGCAGGTT       | GAGTCCGAGTGCTCCAGCTGCGAG  |
| LOC_Os11g36160 | TGGCGAGATCACTCGCGTTG         | CCATGTGCAGTGCTGGCCGT      |
| LOC_Os05g51470 | AAGGTGGCGGAACCCAAGGACC       | AAGACCTCCCTGCTGGTGTGCGAAG |
| LOC_Os08g44270 | TGTGGGAGCTGTACGAGCGGT        | CGGAACTCGTCGGCGGTCATGT    |
| LOC_Os08g02700 | GCGTGCTACAAGGCGCTGAG         | CACCTGGTTCATGGCGTTCA      |
| LOC_Os01g41710 | GCGGTCCAGGTGGTGTCTCAT        | GCCCAGGCGTTGTTGTTGA       |
| LOC_Os12g19381 | CGATCCAAGTGGGTGCCT           | CGATGATGCGAACA AATGC      |
| LOC_Os10g21268 | GGCAGCATTCCGAGTAAC           | AACCCTCTTCAAATAGGTCTAA    |
| LOC_Os07g37240 | TGGTGGATGGGTCGTCTGAC         | TGCAGCCGCTCCTTCTTCT       |
| LOC_Os09g30340 | GGGGCGGTTGCTGTTCTTC          | GTTTGGGTTGTATCCGTTGCTG    |
| LOC_Os10g39150 | TGCAAGAGGCTGGCGAGGAA         | CCATGAGACCAGGAACGATAGG    |
| LOC_Os01g67860 | TGCCTGCCATTGCTTCC            | CGAGCACAGCATCACCT         |
| LOC_Os02g53130 | ACA ACTGCTGGTTCAGGGTGA       | TGGTGTACTGCGTGGTGGC       |
| LOC_Os08g36480 | GGAGGACACGACGGAGATGC         | GCGAGACGGCGA ACTTGA       |
| LOC_Os03g58290 | GCCATTAAGAGCAACCTAGAGC       | TGATATGCCAAAGCCAACAC      |
| LOC_Os07g08430 | TTGGGCGTGCCTTACTCT           | TGGACACCGGCTTCTTTT        |
| LOC_Os04g33390 | TGCGGATCTCGGATCTGTGCG        | CGTAGTTGCGGTGGATGCTG      |
| LOC_Os08g04180 | TCAACAATGCTGTGCTCAA          | CCCTCACCTCTGCTCCAAG       |
| LOC_Os08g34720 | GCGGTAATGGGCTTTGGC           | TCGTCGTTGAAGACCTGGAT      |
| LOC_Os09g37540 | GGCGGGTTTGCGTGTCT            | TTGCCCATCAGAGTGGTAGGT     |
| LOC_Os06g05700 | TGGGTTTAGGATTGGTGC           | CCTGATTTGCTGGATTGA        |
| LOC_Os04g59520 | GGTGGTCGTCAAGGACAAGGA        | GCGAGGCTGTCAAGGGAGA       |
| LOC_Os03g06200 | TACAAGACGCACGCGGACAA         | GCGAGGGTGAACGGCACAT       |
| LOC_Os01g27750 | TGGTCATGCCCTGAGATT           | CGCTGACA ACTTTAATCCC      |
| LOC_Os06g04280 | AACTTGGTGGGATGTGCG           | TGTACTTCTGCCCTCCCTTA      |
| LOC_Os03g51080 | GAAACAGGCTGGGACACG           | AGTTGAGGGTGAAGGTGGG       |
| LOC_Os03g27230 | GAGAAGAGCCGCATCCCT           | GTTAGCCCAGCAGCAGACA       |
| LOC_Os10g25130 | GAGGGACTTGTTCTTCTGG          | TCACTGACGCCACTTTGT        |
| LOC_Os10g39260 | TGGCAACGCTGCTGGTGTGCTG       | TGCACTGCGTCCAGACGAGCT     |
| LOC_Os04g09260 | TGACACGCCTGGGCATGTCGT        | ACGTCCTCCAGGGTGCAGTT      |
| LOC_Os04g22120 | CACCTTCAGCTATGACGCGGA        | TGAAGCTCGCGGCGAAGCTG      |
| LOC_Os01g38359 | CAACAGGAGTTCTTCGTGTGGG       | ATCCTCGGGTTTGGAGCACTTGG   |

|                |                     |                        |
|----------------|---------------------|------------------------|
|                | T                   |                        |
| LOC_Os01g53920 | ACGTTCCCGACGAGCGTGA | CAGCTTCTGCAATCGGGACAAC |
